# Supplementary material for: Diagnostic accuracy of non-invasive SARS-CoV-2 screening tests: a national prospective analysis
Source: Research Square preprint supplement (doi:10.21203/rs.3.rs-6144947/v1), 2025-03-11
Supplement: Supplementary file 1 [file ea378c81f415baeabdc3196d.docx]

**Diagnostic accuracy of non-invasive SARS-CoV-2 screening tests: a national prospective analysis**

*Supplementary material*

**Figure 1.** Procedure for collecting saliva intended to the staff of the community centre in Monaco

**Table 1.** Characteristics of the participants according to the SARS-CoV-2 test evaluated in Monaco between February 2021-February 2023

|  | **Buccal RAT**  **(n=1,562)** | **Buccal RT-PCR**  **(n=1,605)** | **Saliva RAT**  **(n=2,087)** | **Saliva RT-PCR**  **(n=1,940)** |
| --- | --- | --- | --- | --- |
| Female, n (%) | 726 (46.5) | 757 (47.2) | 1,099 (52.7) | 1,024 (52.8) |
| Age, median (IQR) | 44 (34-54) | 45 (34-54) | 51 (38-61) | 51 (39-62) |
| BMI, median (IQR) | 23.8 (21.5-26.9) | 23.8 (21.3-27.0) | 23.9 (21.3-26.9) | 23.8 (21.3-26.9) |
| Comorbidity, n (%) | 315 (20.2) | 325 (20.3) | 465 (22.3) | 433 (22.3) |
| Allergy, n (%) | 64 (4.1) | 66 (4.1) | 76 (3.6) | 72 (3.7) |
| Activity, n (%) |  |  |  |  |
| - None | 97 (6.2) | 112 (7.0) | 220 (10.5) | 207 (10.7) |
| - Retired | 87 (5.6) | 97 (6.0) | 212 (10.2) | 203 (10.5) |
| - Health worker | 40 (2.6) | 40 (2.5) | 44 (2.1) | 40 (2.1) |
| - Independent | 99 (6.3) | 106 (6.6) | 131 (6.3) | 118 (6.1) |
| - Manual | 266 (17.0) | 253 (15.8) | 246 (11.8) | 234 (12.1) |
| - Educational | 88 (5.6) | 91 (5.7) | 142 (6.8) | 129 (6.7) |
| - Office | 730 (46.7) | 747 (46.5) | 827 (39.6) | 752 (38.8) |
| - Other | 155 (9.9) | 159 (9.9) | 265 (12.7) | 257 (13.3) |
| Smoker, n (%) | 513 (32.8) | 519 (32.3) | 581 (27.8) | 539 (27.8) |
| Presence of symptoms, n (%) | 620 (39.7) | 633 (39.4) | 895 (42.9) | 830 (42.8) |
| Previously infected, n (%) | 69 (4.4) | 86 (5.4) | 585 (28.0) | 652 (29.0) |
| Fully vaccinated, n (%) | 172 (11.0) | 267 (16.6) | 1,404 (67.3) | 1,332 (68.7) |

RAT – Rapid antigen test

RT-PCR – Reverse transcriptase polymerase chain reaction

IQR – Interquartile range

Comorbidity includes cardiovascular disease, chronic pulmonary disease, cancers, auto-immune disease, and diabetes.

Other activity includes artists, athletes, and priests.

**Table 2.** Number of participants according to SARS-CoV-2 detection in buccal and saliva swabs compared to nasopharyngeal swab using RT-PCR tests overall, and according to previous SARS-CoV-2 infection, vaccination and presence of symptoms in Monaco.

|  | **Nasopharyngeal** | | | | | | | | | | | | | | | | | | | | |
| --- | --- | --- | --- | --- | --- | --- | --- | --- | --- | --- | --- | --- | --- | --- | --- | --- | --- | --- | --- | --- | --- |
|  | **Overall** | | | **Previously infected** | | | **Not previously infected** | | | **Vaccinated** | | | **Not vaccinated** | | | **Symptomatic** | | | **Asymptomatic** | | |
| **Buccal** | Negative | Positive | Total | Negative | Positive | Total | Negative | Positive | Total | Negative | Positive | Total | Negative | Positive | Total | Negative | Positive | Total | Negative | Positive | Total |
| Negative | 1,457 | 21 | 1,478 | 73 | 9 | 82 | 1,384 | 12 | 1,396 | 251 | 0 | 251 | 1,206 | 21 | 1,227 | 554 | 11 | 565 | 903 | 10 | 913 |
| Positive | 5 | 122 | 127 | 0 | 4 | 4 | 5 | 118 | 123 | 1 | 15 | 16 | 4 | 107 | 111 | 2 | 66 | 68 | 3 | 56 | 59 |
| Total | 1,462 | 143 | 1,605 | 73 | 13 | 86 | 1,389 | 130 | 1,519 | 252 | 15 | 267 | 1,210 | 128 | 1,338 | 556 | 77 | 633 | 906 | 66 | 972 |
| **Saliva** | Negative | Positive | Total | Negative | Positive | Total | Negative | Positive | Total | Negative | Positive | Total | Negative | Positive | Total | Negative | Positive | Total | Negative | Positive | Total |
| Negative | 1,057 | 41 | 1,098 | 395 | 15 | 410 | 662 | 26 | 688 | 735 | 25 | 760 | 322 | 16 | 338 | 397 | 20 | 417 | 660 | 21 | 681 |
| Positive | 58 | 784 | 842 | 20 | 132 | 152 | 38 | 652 | 690 | 38 | 534 | 572 | 20 | 250 | 270 | 18 | 395 | 413 | 40 | 389 | 429 |
| Total | 1,115 | 825 | 1,940 | 415 | 147 | 562 | 700 | 678 | 1,378 | 773 | 559 | 1,332 | 342 | 266 | 608 | 415 | 415 | 830 | 700 | 410 | 1,110 |

**Figure 2.** SARS-CoV-2 variants and subvariants in Monaco betweenMarch 2021 and February 2023

**Table 3.** Distribution of SARS-CoV-2 detection comparing the buccal rapid antigen diagnostic test (RAT) compared with nasopharyngeal RT-PCR test in Monaco.

|  | **Nasopharyngeal RT-PCR test** | | |
| --- | --- | --- | --- |
| **Buccal RAT** | Negative | Positive | Total |
| Negative | 1,086 | 125 | 1,211 |
| Positive | 306 | 45 | 351 |
| Total | 1,392 | 170 | 1,562 |

RAT – Rapid antigen test

RT-PCR – Reverse-transcriptase polymerase chain reaction

**Table 4.** Diagnostic accuracy of SARS-CoV-2 detection of the buccal rapid antigen diagnostic test compared with nasopharyngeal RT-PCR test in Monaco.

| **Sensitivity**  **(95% CI)** | **Specificity**  **(95% CI)** | **Positive predictive value**  **(95% CI)** | **Negative predictive value**  **(95% CI)** |
| --- | --- | --- | --- |
| 26.5% (24.3-28.7) | 78.0 (76.0-80.1) | 12.8 (11.2-14.5) | 89.7 (88.2-91.2) |

95%CI – 95% confidence interval
